# Supplementary material
Source: publisher figshare collection journal article supplement (https://gsapubs.figshare.com/ndownloader/files/23306843)
Supplement: Supplementary file 1 [file 23306843]

## Sheet: Table DR1
TABLE DR1. THERIAN MAMMALS
Standhardt (1986)				This paper
LSUMG V-107, "Glen Eleven"
	"Condylarthra"			"Condylarthra"
		Arctocyonidae			"Triisodontidae"
			Eoconodon coryphaeus			Triisodon quivirensis

## Sheet: Table DR2
TABLE DR2. SUMMARY OF 40Ar/39Ar RESULTS
							Mean Age
Sample	Location (m)	L#	Irrad	min	analysis	n	MSWD	K/Ca	±	2s	Age(Ma)	±	1s
SS02	19	63612	NM-276C	san+	Mean	6	1	43	±	50.3	76.28	±	0.06
SS07	103	63614	NM-276C	mostly san	Mean	4	1.8	7.5	±	28.6	68.83	±	0.13
SS08	135	63616	NM-276C	mostly san	Mean	11	0.7	4.9	±	16.7	68.08	±	0.03
SS13	196	63618	NM-276C	mostly san	Mean	4	4.7	0.4	±	0.8	70.58	±	0.44

## Sheet: Table DR3
TABLE DR3. ARGON DATA
	ID	40Ar/39Ar	38Ar/39Ar	37Ar/39Ar	36Ar/39Ar	39ArK	K/Ca	40Ar*	Age	±1s
					(x 10-3)	(x 10-15 mol)		(%)	(Ma)	(Ma)
	SS02, sanidine&plagioclase, J=0.0039178±0.02%, IC=1.03222±0.00130, NM-276C, Lab#=63612
	59	13.5896	0.0064229	0.017286	9.3736	0.260661	29.5154	79.6144	75.9481	0.377272
	36	10.9345	0.0090497	0.0084313	0.3619	0.512445	60.5131	99.0266	75.9967	0.179941
	27	11.1895	0.0127685	0.0085664	1.1353	0.491598	59.5587	97.0057	76.1797	0.181602
	32	11.0156	0.0182807	0.0128472	0.5403	0.539882	39.7132	98.56	76.1962	0.175953
	61	14.8694	0.0258427	0.59901	13.7295	0.0839103	0.851745	73.0273	76.2535	1.09317
	29	10.9572	0.0119531	0.0075196	0.264	1.49937	67.8499	99.2929	76.352	0.0660758
#	62	13.5952	0.0172379	0.0273867	6.6103	0.495367	18.6296	85.6403	81.6033	0.218013
#	06	18.3601	0.015731	0.0060038	3.9656	2.75675	84.9802	93.6176	119.243	0.0614644
#	35	23.0722	0.0149807	0.006189	8.3195	0.496528	82.4372	89.3432	142.116	0.282676
#	28	23.0955	0.0149252	0.0034329	2.9639	1.36996	148.622	96.2078	152.74	0.111611
#	19	25.7666	0.0126019	0.0019102	1.1034	2.62845	267.095	98.7347	173.866	0.0710158
#	12	27.3428	0.0145883	0.0019364	1.681		263.481	98.1834	183.01	0.106493
#	05	27.229	0.0125668	0.0023906	1.2938	3.11068	213.421	98.5961	183.013	0.0682078
#	14	31.4887	0.0137698	0.0052606	11.1007	1.66601	96.9859	89.5813	191.831	0.146442
#	17	29.6821	0.0130887	-0.0033907	2.2894	0.629493	-	97.7192	196.966	0.267133
#	48	31.5882	0.0155012	0.0027489	2.9964	0.890746	185.603	97.1971	207.868	0.189401
#	16	32.035	0.0120153	0.0031764	1.53	1.45097	160.623	98.5891	213.493	0.129092
#	18	34.2937	0.0178062	0.0020556	3.153	0.398521	248.202	97.2833	224.812	0.450531
#	10	35.2474	0.0139496	0.0016802	1.0413	5.76012	303.657	99.1272	234.791	0.0495353
#	23	40.671	0.0151566	0.003657	3.7398	0.940409	139.514	97.2831	263.745	0.215237
#	40	40.0229	0.0125701	0.0012535	1.2462	1.13196	407.024	99.0799	264.294	0.198535
#	46	59.7377	0.006039	-0.0064111	3.3071	0.216133	-	98.3627	379.201	1.14018
	Mean age ± 1s			n=6	MSWD=0.99				76.2789	0.0561601
	SS07, sanidine&plagioclase, J=0.0039193±0.02%, IC=1.03378±0.00143, NM-276C, Lab#=63614
	16	10.198	-0.0146838	1.7207	2.7397	0.0453781	0.29651	93.4127	67.1266	1.0157
	14	10.3101	0.0174865	1.37283	2.5337	0.0751645	0.371645	93.8084	68.1175	0.632982
	47	9.90407	0.0151212	0.017617	0.4041	0.528543	28.9609	98.8081	68.8403	0.0972102
	01	10.9464	0.0310731	1.57079	4.059	0.0835903	0.324807	90.1961	69.5226	0.596538
#	05	12.1735	0.0049116	1.64747	7.5046	0.0695149	0.309689	82.8626	71.0098	0.744069
#	04	11.1303	0.0130532	3.00379	4.1078	0.048784	0.169854	91.2655	71.5621	0.968147
#	21	11.4725	-0.0401316	2.32037	4.8277	0.0363079	0.21988	89.1813	72.0349	1.32609
#	23	10.4398	0.0108516	0.0095656	0.2665	0.799044	53.3374	99.2521	72.8132	0.0663754
#	38	11.776	-0.11239	2.18817	4.9697	0.0374561	0.233164	89.0019	73.7516	1.30726
#	24	12.9742	0.0034581	3.26101	9.3102	0.0375756	0.156456	80.81	73.8356	1.26979
#	25	20.7686	0.0229185	6.67357	36.5322	0.0189116	0.0764514	50.5955	74.1907	2.71981
#	30	14.7584	0.0070125	3.45377	15.0021	0.0171138	0.147724	71.8341	74.6593	2.9685
#	19	12.0083	0.0914417	4.30457	5.6363	0.0459013	0.118526	89.0273	75.3096	1.11025
#	12	11.3804	0.017744	2.24442	2.7634	0.0538142	0.227321	94.413	75.5707	0.896924
#	34	12.4922	-0.0086433	1.29357	3.2188	0.0444639	0.394415	93.2139	81.7117	1.19853
	Mean age ± 1s			n=4	MSWD=1.81				68.8265	0.127584
	SS08, sanidine&plagioclase, J=0.0039123±0.02%, IC=1.03378±0.00143, NM-276C, Lab#=63616
	36	24.668	0.0617697	10.9831	54.0884	0.0246118	0.0464538	38.7829	67.7569	2.27327
	46	14.9083	-0.0497588	4.29092	18.9787	0.0653856	0.118903	64.6774	67.9484	0.855835
	37	12.3972	0.0581511	5.35839	10.7855	0.0494327	0.0952159	77.7717	67.9864	0.995595
	13	11.3092	0.0614265	7.48351	7.7258	0.0383112	0.0681771	85.1501	68.0013	1.3203
	30	9.84077	0.0133577	0.0283005	0.5344	1.2035	18.0281	98.4172	68.0234	0.0469808
	40	9.74525	0.0120784	0.0241377	0.1775	1.68306	21.1372	99.4812	68.0894	0.0322825
	43	9.87347	0.0139192	0.0369069	0.6095	0.823657	13.8241	98.2047	68.1012	0.0617766
	10	10.6014	0.0021064	3.27261	3.9791	0.140664	0.155901	91.3915	68.2071	0.373604
	41	10.6006	0.0221127	2.76083	3.6716	0.104388	0.184801	91.862	68.5218	0.480862
	35	9.97742	-0.0017482	2.94338	1.5708	0.0699708	0.17334	97.7237	68.6131	0.663405
	06	14.0449	0.0501367	7.38575	15.9992	0.0508611	0.0690795	70.5696	69.9575	0.993151
#	23	10.9097	0.0181801	3.51731	4.0438	0.143511	0.145055	91.6432	70.356	0.364401
#	14	13.0978	0.0190665	4.66508	11.4635	0.0519291	0.109367	76.9977	71.0216	1.00628
#	48	10.6226	0.0191291	0.140031	1.6628	0.750269	3.6435	95.4782	71.1828	0.077428
#	15	10.7599	0.0177197	3.51261	2.6042	0.151846	0.145249	95.4798	72.2562	0.335362
#	19	12.904	0.399508	7.35016	10.8598	0.0499298	0.069414	79.7694	72.5959	1.05655
#	42	11.7666	0.0244511	4.21768	5.9657	0.0834354	0.120968	87.904	72.7773	0.674707
#	38	15.252	0.0122114	3.97443	17.4431	0.027392	0.128372	68.2905	73.2753	1.88031
#	08	10.5421	0.0118517	0.0273618	0.2974	1.14095	18.6466	99.1864	73.3379	0.0481141
#	34	10.7427	0.0544454	2.03557	1.4986	0.0703735	0.250644	97.4121	73.4985	0.696104
#	07	12.1897	0.0156463	3.23053	6.6342	0.114431	0.157932	86.0471	73.7327	0.470268
#	24	11.9424	0.0342015	2.40014	3.7245	0.0805926	0.212573	92.4041	77.4472	0.646427
#	18	12.2965	0.0196119	0.129982	3.8586	0.594929	3.9252	90.8074	78.2249	0.118383
#	17	12.1994	0.0048377	0.228838	3.434	0.107928	2.22954	91.8267	78.4779	0.467562
#	04	13.3676	0.066958	3.05687	8.1033	0.0205308	0.166904	83.9299	78.754	2.45484
#	44	12.1724	0.0137868	0.0042892	2.5772	0.806492	118.951	93.7422	79.8936	0.0883717
#	21	33.9322	0.209752	2.07288	73.8746	0.0427859	0.246133	36.1536	85.9145	1.67097
#	49	13.7111	0.0235854	4.43966	3.185	0.0725938	0.11492	95.7476	91.9094	0.737228
#	32	17.1579	0.0169873	0.0121748	5.551	1.31982	41.9066	90.4414	107.839	0.213023
	Mean age ± 1s			n=11	MSWD=0.69				68.0767	0.0266784
	SS13, sanidine&plagioclase, J=0.0039009±0.02%, IC=1.03222±0.00130, NM-276C, Lab#=63618
#	84	13.4304	0.0320985	3.26207	14.5779	0.240243	0.156405	69.8701	65.9192	0.433381
	34	18.9005	0.0304355	0.499092	30.5084	0.38924	1.02226	52.4958	69.5067	0.369591
	56	15.9335	0.0146358	3.52364	20.8302	0.288783	0.144795	63.1344	70.5947	0.412925
	29	14.8667	0.0085995	1.71263	16.3694	0.320736	0.297907	68.3745	71.2288	0.347576
	07	16.2252	0.0127795	3.09814	21.2655	0.194411	0.164681	62.7923	71.4598	0.591785
#	39	10.5505	0.0128618	0.0071174	0.606	3.92399	71.684	98.3067	72.5476	0.0291856
#	26	16.7599	0.021314	2.60328	22.2205	0.352677	0.195985	62.0581	72.8985	0.383607
#	18	11.4489	0.0177627	1.96463	3.9462	0.652465	0.259695	91.1941	73.1235	0.155344
#	06	11.6491	0.0112562	2.29132	3.9648	0.405819	0.222668	91.5237	74.6579	0.235698
#	04	12.4004	0.0144451	0.0149426	5.6977	1.79789	34.1443	86.4233	74.921	0.0903482
#	57	11.2924	0.0136174	0.0094523	1.4883	3.537	53.9767	96.1095	75.8487	0.0374444
#	55	11.2016	0.0130861	0.0067073	1.1675	3.62954	76.067	96.9227	75.8743	0.0359631
#	58	23.3953	0.0283998	5.97576	44.2108	0.0945008	0.0853789	46.2019	75.8885	1.17067
#	35	11.8245	0.0146409	1.1586	3.2745	0.504144	0.440364	92.6028	76.5742	0.192599
#	79	11.1467	0.0106191	0.0100569	0.2971	3.50185	50.7317	99.2186	77.2617	0.0298935
#	05	11.7585	0.0147867	0.0118804	2.3271	4.9287	42.945	94.1562	77.345	0.0341093
#	21	11.7542	0.0134094	0.0076568	1.7613	2.91862	66.6341	95.5743	78.4568	0.0493929
#	28	12.3556	0.0162284	0.0083564	3.4001	1.71997	61.0555	91.8689	79.2589	0.0734164
#	30	11.9246	0.0136396	0.0065714	1.8043	4.45889	77.6401	95.5303	79.5348	0.0347932
#	60	11.5755	0.0168263	0.0083819	0.5838	6.10991	60.8697	98.5153	79.6155	0.0232817
#	45	12.0363	0.0149513	0.0062918	2.0898	2.88707	81.0903	94.8704	79.7217	0.0498022
#	62	11.9557	0.012791	0.0118139	1.8061	2.10628	43.1868	95.5408	79.7467	0.0585924
#	13	12.4235	0.0124875	0.0063514	1.4709	6.89316	80.3294	96.503	83.6143	0.0240934
#	61	12.5826	0.0125737	0.0197262	0.2522	6.85406	25.8643	99.4198	87.1615	0.0204617
#	69	21.4419	0.0138258	0.000846	7.5546	5.71635	603.078	89.585	132.218	0.0521229
#	36	51.2845	0.0364674	2.28311	99.0765	0.0756333	0.223469	43.2629	152.157	1.92383
#	71	23.2475	0.0112065	0.0009705	1.3455	1.49976	525.713	98.2892	156.242	0.0977488
#	27	24.8634	0.0222665	0.0052799	6.7952	1.40283	96.6314	91.9237	156.282	0.12755
#	41	23.8689	0.0126345	0.0025956	2.8032	1.68967	196.565	96.5292	157.493	0.100233
#	70	24.5032	0.0129215	0.0009323	2.5394	1.78417	547.253	96.9368	162.153	0.0934275
#	15	29.7633	0.0160778	0.0136006	19.0825	1.79422	37.5133	81.0527	164.588	0.146204
#	01	28.633	0.013636	0.002682	3.566	4.41759	190.233	96.3195	186.991	0.0588899
#	48	33.7186	0.0137843	0.0013885	4.9764	7.95662	367.45	95.6381	216.846	0.0453988
#	10	34.7658	0.0122006	0.0032342	4.6772	1.86028	157.753	96.0242	224.036	0.112524
#	47	35.6419	0.0130581	0.0029096	1.6595	7.09973	175.352	98.6245	235.171	0.0473286
#	52	36.3058	0.0131204	0.0013369	1.4816	8.4473	381.632	98.7941	239.664	0.0380543
#	24	36.9945	0.0132599	0.0026168	1.3522	8.37605	194.972	98.9202	244.213	0.105308
#	38	37.6476	0.0138516	0.0053552	2.4008	5.60654	95.2726	98.1164	246.359	0.0522555
#	20	46.1431	0.0461434	0.017009	30.94	0.125176	29.9961	80.1869	246.758	1.34521
#	25	37.8777	0.0126943	0.0039927	2.5229	4.66138	127.784	98.0321	247.568	0.0710105
#	42	38.4	0.0152576	0.003704	3.8299	1.50109	137.744	97.053	248.417	0.153705
#	83	54.5452	0.0394825	0.164352	54.8851	0.252271	3.10434	70.2864	255.113	0.91813
#	16	62.9759	0.0585981	0.0745658	77.2618	0.129742	6.84233	63.7527	266.316	1.78391
#	81	57.9845	0.0125991	0.002192	2.1884	2.81374	232.757	98.8849	369.447	0.111391
#	64	61.9183	0.0133644	0.0042136	2.0033	4.95312	121.085	99.0443	392.577	0.0828637
#	37	85.5587	0.0128023	0.0016461	1.9794	3.58451	309.947	99.3165	524.005	0.127373
#	08	170.442	0.06591	0.278028	213.49	0.0879699	1.83508	62.9982	640.489	4.50602
#	51	519.949	0.219804	1.28049	75.0263	0.254489	0.398446	95.7567	1976.47	3.27388
	Mean age ± 1s			n=4	MSWD=4.71				70.5846	0.440217
	Notes:
	Isotopic ratios corrected for blank, radioactive decay, and mass discrimination, not corrected for interfering reactions.
	Errors quoted for individual analyses include analytical error only, without interfering reaction or J uncertainties.
	Mean age is weighted mean age of Taylor (1982). Mean age error is weighted error
	of the mean (Taylor, 1982), multiplied by the root of the MSWD where MSWD>1, and also
	incorporates uncertainty in J factors and irradiation correction uncertainties.
	Isotopic abundances after Steiger and Jäger (1977).
	# symbol preceding sample ID denotes analyses excluded from mean age calculations.
	Ages calculated relative to FC-2 Fish Canyon Tuff sanidine interlaboratory standard at 28.201 Ma (Kuiper et al., 2008).
	IC = detector intercalibration; Measured 40Ar/36Ar/295.5.
	_ No detectable 37Ar above blank values.
	Decay Constant (LambdaK (total)) = 5.463e-10/a (Min et al., 2000)
	Correction factors:
	(39Ar/37Ar)Ca = 0.0007064 ± 0.000004
	(36Ar/37Ar)Ca = 0.0002731 ± 0.0000005
	(40Ar/39Ar)K = 0.00808 ± 0.00041

## Sheet: Table DR4
TABLE DR4. PALEOMAGNETIC DATA: LINES
Formation	Paleosol number	Strat level (m)	Sample prefix	Sample number	Temperature steps	Stratigraphic Declination	Stratigraphic Inclination	MAD*	Stratigraphic VGP latitude	Stratigraphic VGP longitude
Aguja	P42	0.25	C14BB	01A	460-500	6.4	33	14	77.3	48
Aguja	P42	0.25	C14BB	01C	480-520	11.8	35.5	10.1	75.6	26.2
Aguja	P42	0.25	C14BB	01D	300, 360,380	21.1	25.5	7.1	64.8	21.4
Aguja	ss	7.5	C14BB	126B	250-300	187.4	-22.8	8.9	-71.3	233.7
Aguja	ss	26	C14BB	128B	430-480	118.4	-54.9	20.7	-38.4	10.5
Aguja	P39	30	C14BB	04C	480-520	223.8	-45.7	20.6	-51.6	159
Javelina	P01	57.5	C14BB	16B	250-300	192.6	-35.8	16.5	-75.2	203.5
Javelina	P01	57.5	C14BB	16C	250-300	193	-16.7	12.7	-65.9	223.7
Javelina	P01	59	C14BB	17B	150-250	195.3	-31.2	4.1	-71.2	205
Javelina	P02	61	C14BB	18A	150-250	214	-37.3	4.9	-58.2	174.2
Javelina	P02	61	C14BB	18B	150-250	163	-66.8	18.3	-66.1	48.7
Javelina	P02	61	C14BB	18D	150-250	162.3	-36.6	11.5	-71.7	321.7
Javelina	P03	67	C14BB	122B	150-250	179.9	-35.4	4.7	-80.3	257.3
Javelina	P03	67	C14BB	122C	250-300	203.9	-22.4	7.6	-61.6	200.2
Javelina	P03	68	C14BB	123A	150-250	187.9	-38.7	9.3	-79.7	211.3
Javelina	P03	68	C14BB	123B	200-300	220.2	-27.2	4.5	-50.1	179.8
Javelina	P04	69.5	C14BB	36A	300-360	135.7	-27.2	17.7	-46.6	336.5
Javelina	P04	69.5	C14BB	36C	250-300	125.2	-25.9	8.7	-37.2	341.8
Javelina	P05	70.5	C14BB	37A	250-275,500	188.6	-14.8	10.7	-66.8	234.7
Javelina	P05	72	C14BB	38A	430-460,500	262.1	-72.2	13	-28.5	114.3
Javelina	P05	74	C14BB	39A	400-460	86	-75.8	20.8	-24.2	47.2
Javelina	P05	76	C14BB	40A	380-430	186.2	-62.1	13.5	-75.1	94.5
Javelina	P06	77	C14BB	21C	430-480	158	-24.4	16.5	-63.7	312.4
Javelina	P06	77	C14BB	21D	430-480	158.8	-62.9	20	-67.5	34.3
Javelina	P06	80	C14BB	24A	480, 520-540	174.6	-78.8	12.9	-50.8	73.6
Javelina	P06	80	C14BB	24C	380-430	149	-40.1	7.3	-61.5	341
Javelina	P07	81	C14BB	25B	360, 400-430	338.6	11.1	3.1	58.9	121.3
Javelina	P07	81	C14BB	25C	250-300	19.5	33.5	12.2	69.1	14.1
Javelina	P07	82.25	C14BB	26A	460-500	325.7	26.1	9.7	54.7	148.1
Javelina	P07	82.25	C14BB	26C	250-300	8.5	18.6	6.6	68.7	53.1
Javelina	P07	82.25	C14BB	26D	275-330	16.8	19.5	8.1	65.1	34.1
Javelina	P07	83.5	C14BB	27A	360-400	31	26.8	6.3	57.6	7.9
Javelina	P07	83.5	C14BB	27B	480-520	344.1	47.8	14.9	76.1	168.9
Javelina	P07	83.5	C14BB	27C	150-250	355.7	11.6	9.4	66.2	87.4
Javelina	P07	84.75	C14BB	28A	480-520	0.4	26.5	15	74.7	75.3
Javelina	P07	84.75	C14BB	28B	480-520	24.8	32.8	7.1	64.6	8
Javelina	P07	84.75	C14BB	28D	500-540	21.9	31.7	8.7	66.6	13.1
Javelina	P07	86.5	C14BB	29B	460, 500 - 520	12.9	30.5	9.3	72.5	31.4
Javelina	P07	86.5	C14BB	29C	360-400	357.8	57.2	8	81.3	245.2
Javelina	P07	86.5	C14BB	29D	330, 380-400	358.1	33	18.7	78.6	85.9
Javelina	P07	88	C14BB	30D	150-250	19.1	28.8	9.3	67.6	21
Javelina	P08	89	C14BB	31B	300-360	63.8	33.5	12.1	31.3	342.1
Javelina	P08	89	C14BB	31C	200-275	38.7	45.3	2.4	55.9	341.4
Javelina	P08	89	C14BB	31D	360-400	349.3	25.5	16.6	71.3	111
Javelina	P08	89.5	C14BB	32A	275-330	22.3	30	11.6	65.6	14.7
Javelina	P08	89.5	C14BB	32B	480-520	23.8	47.6	19.9	69.2	342.5
Javelina	P09	90.5	C14BB	33B	250-275, 330	304	74.3	9.2	41.7	223.8
Javelina	P09	90.5	C14BB	33D	200-250, 300	344.2	29.2	7.3	70	126.9
Javelina	P09	92.5	C14BB	34A	TT100-200	24.9	43.6	3.4	67.6	350.6
Javelina	P09	92.5	C14BB	34B	TT100-300	25.6	42.1	5.6	66.7	353
Javelina	P09	95	C14BB	35A	TT150-300	17.3	41.9	7.6	73.7	1.1
Javelina	P09	95	C14BB	35B	360-380,480	29.2	36.7	6.3	62.2	358.6
Javelina	P09	95	C14BB	35C	TT100-250	24	54.3	14.1	69	325.3
Javelina	ss	102	C14BB	125B	430480520	152.5	-17.5	12.3	-57.2	314
Javelina	P10	104	C14BB	41D	520-560, 600	170.3	-18.5	4.5	-68.2755	282.777
Javelina	P10	103	C14DC	02B	460480560	143.4	-43.8	5.5	-57.4	349.2
Javelina	P10	103	C14DC	02C	150-250	178.8	-18.8	7.2	-70.3	260.3
Javelina	P11a	106	C14BB	42D	560-600	163	-23.9	4.7	-66.986	302.997
Javelina	P12	113.5	C14BB	43A	480-560	161.5	-18.3	1.7	-63.6	301.5
Javelina	P12	113.5	C14BB	43C	540-580	176.7	-43.2	3.3	-84.9758	292.611
Javelina	P13	114	C14BB	44A	460-500	169.6	-27	3.2	-72.235	291.083
Javelina	P13	114	C14BB	44C	250, 360-380	176.2	-21.2	4.1	-71.4041	267.872
Javelina	P13	114	C14BB	44D	500-560	188	-67.4	17.7	-68.1555	89.9459
Javelina	P13	115	C14BB	46A	400, 460, 500	182.5	-37.3	11	-81.3218	240.426
Javelina	P13	115	C14BB	46B	400-430, 500	179.9	-21.8	11	-72.0789	256.419
Javelina	P13	115	C14BB	46C	430-460, 500	167.2	-18	18.9	-66.6749	289.625
Javelina	P13	116	C14BB	47B	400-460	173.7	-23.2	9.6	-71.8903	276.293
Javelina	P13	116	C14BB	47C	330-380	103	-38.1	13.3	-21.2	0.1
Javelina	P13	116	C14BB	47D	480, 520, 600	155.9	-40.3	8.9	-67.5214	335.595
Javelina	P13	117	C14BB	48A	200-300, 360-380	173.2	-26.4	15.4	-73.4642	279.914
Javelina	P13	117	C14BB	48C	360-400	174.3	-41.6	7.7	-82.6544	301.335
Javelina	P14	119	C14BB	49C	330360430	178	-24.9	12.7	-73.7303	263.07
Javelina	P14	119.5	C14BB	50B	150-250	151.5	-20.9	9.4	-57.6	317.8
Javelina	P14	119.5	C14BB	50C	250, 300-330	156.9	-32.1	12.3	-65.7899	322.006
Javelina	P14	119.5	C14BB	50D	250-200,480	160.2	-13.8	11.3	-60.9	300.5
Javelina	P14	120.2	C14BB	52A	150-250	221.4	-77.3	15.9	-45.575	98.9434
Javelina	P14	120.2	C14BB	52B	300330380	185.7	-42.9	13.5	-83.3441	205.103
Javelina	P14	120.2	C14BB	52C	100, 300-360	181.4	-32.4	16	-78.3043	249.503
Javelina	P15	121	C14BB	53A	360, 460-480	188.7	-14.2	5.4	-66.5052	233.988
Javelina	P15	121	C14BB	53C	250-330	168.2	-34.6	8.1	-75.1867	305.224
Javelina	P15	121	C14BB	53D	300, 380-400	186.8	-16.3	11.8	-68.134	237.765
Javelina	P15	123	C14DC	03A	250-330	188.4	-13.6	13.2	-66.2	235.7
Javelina	P15	123	C14DC	03D	200-300	186.2	-24.8	4.6	-72.7	236
Javelina	P16	124	C14BB	54B	300, 400, 500	189.5	-17.2	5.5	-67.7078	230.634
Javelina	P16	124	C14BB	54C	360-380, 580	179.6	-18.4	2.2	-70.2099	257.265
Javelina	P16	124	C14BB	54D	400-430,480	176.1	-13.4	8.7	-67.2	266.8
Javelina	P17	125.5	C14BB	55D	250-330	182.7	-26	6.1	-74.2748	246.378
Javelina	P17	132	C14BB	56A	200-300	170.2	-37.8	7.9	-78.0472	306.117
Javelina	P17	132	C14BB	56C	200-330	179.7	-30.8	9.8	-77.3642	257.414
Javelina	P17	132	C14BB	56D	330400480	194.7	-62.5	5.5	-71.2696	110.845
Javelina	P17	133	C14BB	57A	330, 380-400	89	-55.3		-15.9	19.3
Javelina	P19	144	C14BB	120C	480,540-560	96.2	-50.8	3.8	-19.6	12.6
Javelina	P19	146	C14BB	59A	430520540	189.8	-19.3	4.7	-68.6332	228.702
Javelina	P19	146	C14BB	59B	520580600	214.3	-40.2	4.6	-58.6629	169.62
Javelina	P19	146	C14BB	59C	430480500	182.5	-21.6	9.3	-71.8175	248.219
Javelina	P19	147.5	C14DC	04A	430550560	208.1	-62.7	13	-63.3	125.5
Javelina	P19	149	C14BB	60B	300, 330, 460, 480	278.4	-58.3	14.4	-12.0155	127.924
Javelina	P20	162	C14DC	05A	380400480	194.6	-52.1	2.7	-77	147.8
Javelina	P20	162	C14DC	05B	560580590	193.6	-38.5	6.5	-75.6	195.5
Javelina	P20	162	C14DC	05D	360-400	193.3	-41.8	5.7	-77	187.3
Javelina	P20	160	C14BB	62A	250-330	205.1	-49.9	16.4	-68.2506	155.948
Javelina	P20A	163.5	C14BB	92A	250, 330, 360, 500	197.3	-14.6	11.6	-62.7824	215.954
Javelina	P20A	163.5	C14BB	92C	500560580	192.1	-31.8	7.3	-73.6598	210.73
Javelina	P20A	163.5	C14BB	92D	330380430	192.6	-39	5	-76.5718	195.56
Javelina	P21	169	C14DC	06D	430, 460, 580	108.6	-30.4	9.9	-23.9	352.8
Javelina	P22	175	C14DC	07A	460-500	149.8	-55.7	18.3	-63.8	10
Javelina	P22	175	C14DC	07C	330360430	150.6	-37.9	11.7	-62.3	336.7
Javelina	P22	175	C14DC	07D	460-500	149.9	-22.8	18.5	-57	321.2
Black Peaks	P24	181	C14BB	102A	150-200, 380	149.1	-32.7	13.5	-59.5	331.5
Black Peaks	P28	193	C14BB	68A	300, 350-380	117.2	-47.7	16.2	-35.8	2.8
Black Peaks	P28	193	C14BB	68D	150-200	201.2	-58	12.7	-70.1116	132.199
Black Peaks	P29	201	C14BB	70C	250-300	223.7	-27.9	16.4	-47.3	356.8
Black Peaks	P29	202	C14BB	72A	100-200	195.2	-17	11.3	-64.9931	218.285
Black Peaks	P31	205.5	C14BB	76C	400-460	249.5	-31.9	15.8	-25.9074	159.971
Black Peaks	P32	208	C14BB	77C	430460500	184.6	-41.2	9.1	-83.058	218.665
Black Peaks	P34	213	C14BB	79D	150-200, 300	155.4	-37.1	18.8	-66.2	331.3
Black Peaks	P34	215	C14BB	80C	150-200	197.5	-59.1	18.6	-72.1363	124.89
Black Peaks	P35	217	C14DC	09B	300-360	159.2	-24.6	7	-64.7	310.8
Black Peaks	P35	217	C14DC	09C	500-540	156.5	-7.3	16.9	-56	302.2
Black Peaks	plug	220	C14BB	107B	150200300	184.7	-21.4	18.3	-71.3339	241.549
Black Peaks	plug	220	C14BB	107C	150-200, 275	185.1	-16.2	13	-68.4943	242.215
Black Peaks	P36	226.5	C14BB	83D	150-200,275	195.5	-26	7.9	-68.8563	210.064
Black Peaks	P36	228	C14BB	85C	100-200	213.4	-34.4	16.6	-57.9338	177.291
Black Peaks	P37	232	C14BB	86A	480, 520-540	355.1	-80.9	20.1	-11.6	78.3
Black Peaks	P37	232	C14BB	86C	275-330	221.4	-25.1	8.1	-48.4785	179.856
Black Peaks	P37	233	C14BB	87A	300-360	188	-39.5	5.5	-80	208.7
Black Peaks	P37	233	C14BB	87C	250-300	176	-67	7.3	-69.4	69.4
Black Peaks	P37	233	C14BB	87D	300-360	216.6	-36.6	5.5	-55.8	173.4
Black Peaks	P38	236	C14BB	89C	AF100-150	186.1	-12.4	13.7	-66.3	241.5
Black Peaks	P38	242	C14BB	91A	100-200	124.5	-65.4	7	-44	26.1
Black Peaks	P38	242	C14BB	91B	100-200	231.4	-72.9	11.1	-44.6	111.8
Black Peaks	P38	242	C14BB	91D	100-200	198.7	-36.9	3.4	-71	189.8
Note: *mean angular deviation

## Sheet: Table DR5
TABLE DR5. PALEOMAGNETIC DATA: CIRCLES
Formation	Paleosol number	Strat level (m)	Sample prefix	Sample number	Temperature step	Stratigraphic Declination of temperature step	Stratigraphic Inclination of temperature step	MAD* of temperature step	Stratigraphic VGP latitude of temperature step	Stratigraphic VGP longitude of temperature step	Temperature steps for great circle	Stratigrahic declination of great circle	Stratigrahic Inclination of great circle	MAD* of great circle
Aguja	mud	10	C14BB	07A	500	209.5	-74.4	9.1	-53.2	99.6	430, 460, 500	119.2	3.1	15.3
Aguja	mud	10	C14BB	07B	460	174.1	-38.5	7.8	-80.7	293	400, 430, 460	96.5	32	18.3
Aguja	mud	10	C14BB	07C	480	231.5	-56.7	10	-46.8	142.1	430, 460, 480	340.4	-13.6	3.9
Aguja	mud	12	C14BB	08A	480	154.3	-25.9	14.2	-61.5	318.9	430, 460, 480	195.5	51.8	12.8
Aguja	mud	12	C14BB	08B	500	173.1	-57.3	9.6	-79.7	44.9	460, 480, 500	94.8	4.8	3.9
Aguja	mud	13.5	C14BB	10C	520	209	-4.6	4.9	-79.7	44.9	430, 480, 520	127.3	52.8	10.8
Aguja	mud	15.5	C14BB	09A	460	153.7	-2	8.3	-52.2	303	400, 430, 460	64	28.9	11.4
Aguja	mud	15.5	C14BB	09B	330	246.8	-23.2	380	-26	167.1	275, 300, 330	98.9	-22.4	13.5
Aguja	mud	25	C14BB	127B	460	120.7	5.9	6.5	-24.8	327.8	400, 430, 460	213.3	69.6	9.5
Aguja	P39	32	C14BB	13D	380	127.6	5.2	2.1	-30.6	323.6	275, 300, 380	225.6	56.8	0.9
Aguja	P40	34	C14BB	06B	400	167.5	-21.4	8.8	-68.4	291.9	360, 380, 400	92.4	56.8	16.9
Aguja	P40	34	C14BB	06D	520	175.5	39.8	7.9	-37.9	262	460, 500, 520	121.9	-22.5	17.2
Aguja	P40	38.5	C14BB	11C	200	140.2	37.7	14.8	-26.7	298.7	100, 150, 200	83.7	-33	17.3
Aguja	P40	38.5	C14BB	11D	200	114.3	20.1	13.2	-15.4	325.1	100, 150, 200	217.9	30.2	15.6
Aguja	P41	49.5	C14BB	12A	460	139.3	42	14.8	-23.7	297.2	275, 300, 460	59.1	-12.3	10.7
Aguja	P41	49.5	C14BB	12B	380	142.5	-6.5	7.7	-45.9	317.7	300, 330, 380	51	-23.6	9.4
Aguja	P41	49.5	C14BB	12C	480	112.2	-6.2	5.3	-20.8	338.3	430, 460, 480	24.4	-10.2	5.8
Aguja	ss	56.5	C14BB	130C	430	179.9	-25.5	8.8	-74.1	257.1	380, 400, 430	121.6	46.7	5.3
Javelina	P01	59	C14BB	17A	200	185.2	-4.3	6.5	-62.4	245.5	100, 150, 200	88.1	-10.2	19.4
Javelina	P02	62.2	C14BB	19A	250	209.6	16.7	9.1	-42.6	215.1	150, 200, 250	130.7	-15.9	11.6
Javelina	P02	62.2	C14BB	19B	250	132.8	3.6	8.3	-34.3	317.4	150, 200, 250	41.9	12.5	3.3
Javelina	P02	62.2	C14BB	19D	380	127.3	-70.3	5.4	-44.9	35.9	330, 360, 380	72.9	23.6	19.7
Javelina	P03	64.5	C14BB	20B	500	191.5	-52.2	6.6	-79.6	144.3	460, 480, 500	22	-36.3	5.4
Javelina	P03	67	C14BB	122A	250	190.4	-22.6	13	-70	225.7	150, 200, 250	158.2	63.8	5.6
Javelina	P03	68	C14BB	123C	150	219.5	21.4	4.5	-34.5	207.5	AF100, 100, 150	134.4	-15.4	6.3
Javelina	P04	69.5	C14BB	36B	250	209.1	-16.9	7.5	-55.8	198	100, 150, 200, 250	128.9	25.7	16
Javelina	P05	72	C14BB	38B	330	232.3	-15.2	6.2	-36.5	179.6	275, 300, 330	167.2	59.1	17.3
Javelina	P05	76	C14BB	40D	460	233	-8.6	12	-34.1	182.7	380, 430, 460	333.3	-45.3	5.5
Javelina	P06	78	C14BB	22C	360	259.6	-44.3	12.5	-20.9	147.8	250, 300, 360	34	-42.1	16.3
Javelina	P06	79	C14BB	23A	480	148.7	23.8	6	-38.5	297.1	400, 460, 480	56.5	3.9	3.8
Javelina	P06	79	C14BB	23B	500	190.3	10.5	5.8	-54	239.1	430, 460, 500	91.2	43	4.9
Javelina	P06	79	C14BB	23C	400	211.9	-75.3	14	-51	99.7	330, 360, 400	10.2	-12.3	5.2
Javelina	P06	80	C14BB	24D	500	198.3	-71.2	11.1	-60.5	97.8	380, 480, 500	321	-22.4	19.3
Javelina	ss	102	C14BB	125C	520	121.1	-23.1	14	-32.9	342.3	400, 480, 500, 520	17.8	-24.6	17.4
Javelina	ss	102	C14BB	125A	500	162.3	38.7	10.6	-36.1	277.2	400, 460, 500	113.3	-39.5	2.6
Javelina	P10	104	C14BB	41B	460	168.4	2.2	3.6	-57.6	278.8	380, 400, 430, 460	77.2	26.2	6.5
Javelina	P11a	106	C14BB	42A	600	173.9	-30.3	6.8	-75.8	281.4	560, 580, 600	67.3	-24.5	8
Javelina	P11a	106	C14BB	42C	600	201.7	-15.4	5	-60.4	208.9	560, 580, 600	103.5	-26.9	9.5
Javelina	P11	108	C14BB	45A	580	145.6	22.5	8.5	-37.3	300.8	540, 560, 580	264.1	48.3	5.4
Javelina	P14	119	C14BB	49A	540	167.4	31.1	13	-42.3	273.2	500, 520, 540	70.1	14.2	18.1
Javelina	P14	120	C14BB	51D	430	155.9	-40.6	5.9	-67.6	336.6	380, 400, 430	66.5	7.6	9.4
Javelina	P15	123	C14DC	03B	560	112.9	-8.5	16.3	-22	339	430, 540, 560	112.9	-8.5	16.3
Javelina	P17	126	C14BB	55B	580	112.1	43.7	9.1	-4.9	313.8	540, 560, 580	41.8	-14.3	15.1
Javelina	P17	125.5	C14BB	55C	600	176.3	-2.8	5.2	-61.9	264.6	560, 580, 600	83.8	-31.3	9.8
Javelina	P19	145	C14BB	58A	600	171.4	4.5	3.4	-57.4	272.8	540, 580, 600	81.1	7.7	2.9
Javelina	P19	145	C14BB	58C	580	211.8	48.1	9.2	-24.2	226.5	520, 560, 580	90.9	26.7	11
Javelina	P19	147.5	C14DC	04B	480	147.3	-19.5	5.5	-53.9	321.3	400, 430, 480	193.6	62.3	8.4
Javelina	P20	159	C14BB	61A	560	311.8	-61.9	14.7	5.2	109.9	300, 380, 560	29.1	6.8	19.6
Javelina	P20	160	C14BB	62B	580	11.3	-69.9	5.1	6.3	70.1	250, 300, 580	36.5	17.8	3.7
Javelina	P20	160	C14BB	62C	300	32.6	-74.3	3.4	-3.8	61.4	200, 250, 300	52.9	14.7	4.5
Javelina	P21	167	C14BB	93C	550	318.2	-61.6	10.7	8.3	106.4	520, 540, 550	43.7	0.4	3.5
Javelina	P22	176	C14BB	94A	460	158.9	23.6	9.2	-43.7	285.8	400, 430, 460	92.9	-30.2	12.1
Javelina	P22	176	C14BB	94C	330	148	25.8	14.6	-20.1	339.2	275, 300, 330	78.4	-29.9	12.5
Javelina	P22	176	C14BB	94D	480	109.2	9.4	2.7	-14.2	332.9	430, 460, 480	14.5	14.6	5.9
Javelina	P23	177	C14BB	95C	520	173.6	-4.8	4.9	-62.4	270.7	480, 500, 520	76.7	-31.2	20.3
Javelina	P23	177	C14BB	95D	520	96.7	68.2	0.8	18.6	297.6	480, 500, 520	109.8	-20.1	2.8
Javelina	P23	177.5	C14BB	96A	480	148.6	27.3	7	-36.8	295.8	430, 460, 480	73	-29.8	15.1
Javelina	P23	177.5	C14BB	96B	250	115.8	18	11.2	-17.2	325.2	150, 200, 250	220.7	37.9	10.1
Javelina	P23	177.5	C14BB	96D	400	108.3	-19.1	3	-20.7	346.6	300, 360, 400	28.5	19.6	5.6
Javelina	P23	178	C14BB	97C	480	73.1	-18.6	5.3	9.7	3.6	380, 400, 480	340	-4.5	9.3
Javelina	P23	179	C14BB	99C	540	188.2	28.6	12.9	-44.8	245.6	480, 500, 520, 540	107.1	-27.1	10.2
Javelina	P23	179	C14BB	99D	500	101.2	-14.8	14.9	-13.4	347.9	450, 480, 500	129.7	69.3	14.5
Javelina	P23	179.5	C14BB	100B	400	191.3	5.3	1.5	-56.3	236.1	300, 360, 400	103	-13	2.2
Black Peaks	P24	181	C14BB	102C	300	188.5	59	6.7	-20.5	249.8	150, 200, 300	57.2	26.2	13.8
Black Peaks	P24	181	C14BB	102D	300	168.9	-3	2.2	-60.3	279.6	150, 200, 300	78.3	-30.2	19.7
Black Peaks	P24	182	C14BB	103A	300	54.9	-53.2	13.2	8.3	33.3	150, 200, 300	89.5	30.6	12.9
Black Peaks	P26	187	C14BB	64A	580	102.8	13.7	3.8	-7.6	334.3	520, 560, 580	24.9	-42.3	4.8
Black Peaks	P26	187.6	C14BB	65C	480	241.6	-24.5	5.9	-30.9	169	380, 430, 480	180	44.3	12.4
Black Peaks	P27	189.5	C14BB	66B	540	137	-40.4	10.8	-51.1	347.9	500, 520, 540	176.4	40.8	3.1
Black Peaks	P27	189.5	C14BB	66C	540	133.2	-13.6	5.8	-40.6	329.3	460, 500, 540	111.3	75.4	0.4
Black Peaks	P28	191	C14BB	67A	520	91.4	-32.9	4.4	-9.8	1.9	480, 500, 520	345.7	-24.5	3.3
Black Peaks	P28	191	C14BB	67B	520	95.8	-33.9	4.5	-13.9	0.5	460, 480, 520	103.5	55.7	0.4
Black Peaks	P28	191	C14BB	67D	250	85.9	-30.3	8.8	-4.4	3	150, 200, 250	103.8	58.4	2.2
Black Peaks	P28	193	C14BB	68C	250	156.5	27.8	13.5	-40.4	287.2	150, 200, 250	61.3	5.1	6.1
Black Peaks	P29	201	C14BB	70A	360	153.4	-25.8	11.7	-60.8	319.9	300, 330, 360	51.1	-11.8	13.6
Black Peaks	P29	202	C14BB	72B	200	175.8	-1.6	7.7	-61.2	265.5	100, 150, 200	178.6	-8.6	7.6
Black Peaks	P30	203	C14BB	73B	150	249.7	-36.2	12.3	-26.9	157.7	NRM, 100, 150	2.2	-24.5	9.9
Black Peaks	P30	203	C14BB	73C	275	210.8	-18.1	10.1	-54.9	195.2	150, 200, 275	114.4	-18.9	2.1
Black Peaks	P30	203	C14BB	73D	400	252.6	-49.1	8.6	-28.1	146.2	330, 360, 400	348.1	-8.9	19.7
Black Peaks	P31	205.5	C14BB	76A	330	48.4	-76.3	8.8	-10.7	57.3	275, 300, 330	80.5	13.5	16.1
Black Peaks	P31	205.5	C14BB	76B	250	159.3	6.6	6.8	-51.8	291.6	150, 200, 250	72.8	43.6	19
Black Peaks	P32	208	C14BB	77A	460	106.9	-0.8	10.1	-14.9	338.6	400, 430, 460	198.6	58.6	8.5
Black Peaks	P32	208	C14BB	77B	300	179.4	1.5	5.1	-59.9	257.9	200, 250, 300	88.1	-2.1	20
Black Peaks	P33	211	C14BB	78A	550	170.6	21.8	9.4	-48.4	270.7	480, 540, 550	85.2	-12.5	1.6
Black Peaks	P33	211	C14BB	78C	380	120.2	10.4	7	-23.1	326.1	330, 360, 380	35.1	-44.8	6.7
Black Peaks	P33	213	C14BB	79B	430	191.2	-73.8	8.4	-58.5	87.5	360, 400, 430	105.2	-0.7	3.4
Black Peaks	P34	215	C14BB	80B	300	169.3	-24.9	14.6	-71	290.4	250, 275, 300	99.3	47.6	11.4
Black Peaks	P34	215	C14BB	80D	250	143	-49	8.3	-58	357.2	150, 200, 250	3.2	-34.7	15.5
Black Peaks	P35	217	C14DC	09D	360	138.9	-35.6	15.4	-51.6	341.8	100, 300, 360	6.6	-45.9	19.2
Black Peaks	P36	225	C14BB	82A	300	168	-42.3	12.1	-78.3	325.2	200, 275, 300	112.5	33.9	4.5
Black Peaks	P36	226.5	C14BB	83C	150	268.1	-78	8.5	-27.5	102.9	AF100, 100, 150	322.1	1.5	9.6
Black Peaks	P36	227	C14BB	84C	200	237.1	12.1	9.5	-24.8	189.9	100, 150, 200	324	-14	2.6
Black Peaks	P36	227	C14BB	84D	300	191.5	-1.5	6.4	-59.4	233.7	250, 275, 300	104.2	-18.3	10.1
Black Peaks	P36	228	C14BB	85B	300	197.5	-40.4	8.3	-73.1	184.4	150, 250, 300	202.5	51.5	5.6
Black Peaks	P37	232	C14BB	86D	330	104.6	8.4	7.5	-10.6	335.8	100, 300, 330	16.4	-9.1	2.8
Black Peaks	P37	233.5	C14DC	10B	330	232.2	-37.9	7.7	-42.5	163.9	250, 300, 330	8.6	-45.2	11.7
Black Peaks	P37	233.5	C14DC	10C	430	113.4	-66.2	6.8	-36.6	27.6	380, 400, 430	94.4	22	2.4
Black Peaks	P37	233.5	C14DC	10D	430	161.3	14.6	6.8	-49.1	285.8	300, 380, 430	74.5	-11.6	11.7
Black Peaks	P38	234	C14BB	88A	200	159.7	-1.1	3.2	-55.3	294.3	AF100, 150, 200	64.4	-33.8	12
Black Peaks	P38	234	C14BB	88B	300	162.3	4.2	5.9	-54.3	288.1	150, 200, 300	74	-24.5	3.1
Black Peaks	P38	234	C14BB	88D	200	211.9	17.5	6.3	-40.9	213	100, 150, 200	115.5	10.6	9
Black Peaks	P38	236	C14BB	89B	300	232.1	-31.5	13.5	-41	169.2	100, 200, 300	318.8	-2	17.9
Black Peaks	P38	240	C14DC	11B	330	191.5	-54.8	13.4	-78.6	132	250, 300, 330	47.8	-25.4	12.1
Note: *mean angular deviation

## Sheet: Table DR6
TABLE DR6. PALEOMAGNETIC DATA: SITE MEANS
Formation	Paleosol number	Strat level (m)	Sample prefix	Sample number	n*	Stratigraphic Declination	Stratigraphic Inclination	alpha-95	Stratigraphic VGP latitude	Stratigraphic VGP longitude
Aguja	P42	0.25	C14BB	1	3	13.3	31.5	12.7	72.7	29
Javelina	P02	61	C14BB	18	3	182.7	-49.6	34.5	-87.4	140.2
Javelina	P07	82.25	C14BB	26	3	357.9	22.9	33.6	72.5	83.6
Javelina	P07	84.75	C14BB	28	3	15.4	30.8	18.5	71	25.3
Javelina	P07	86.5	C14BB	29	3	341.5	32.6	25.1	69.5	136.5
Javelina	P13	115	C14BB	46	3	176.2	-25.8	19.4	-73.9	270.2
Javelina	P14	120	C14BB	50	3	156.2	-22.3	15.5	-61.6	313.1
Javelina	P15	121	C14BB	53	3	181.9	-21.9	23.4	-71.9886	250.7
Javelina	P16	124	C14BB	54	3	181.7	-16.4	10.9	-69	252
Javelina	P17	132	C14BB	56	3	179.4	-44	28.8	-86.4	265.5
Javelina	P19	146	C14BB	59	3	194.2	-27.6	28.5	-70.3	211.9
Javelina	P20	162	C14DC	5	3	193.8	-44.1	10.9	-77.3	179.2
Javelina	P20A	163.5	C14BB	92	3	194.2	-28.5	19.7	-70.8	210.8
Javelina	P22	175	C14DC	7	3	150.1	-38.8	25.6	-62.1	338.3
Black Peaks	P37	233	C14BB	87	3	197.3	-48.8	33.9	-75	160.8
Note: *number of samples used for site mean calculation
